# Supplementary material for: Efficient exosome subpopulation isolation and proteomic profiling using a Sub-ExoProfile chip towards cancer diagnosis and treatment
Source: Royal Society of Chemistry journal article supplement (doi:10.1039/d2an01268e), 2022-01-01
Supplement: d2an01268e1.pdf [file d2an01268e1.pdf]

## Efficient exosome subpopulations isolation and proteomic profiling by Sub-ExoProfile chip towards cancer diagnosis and treatment

Yuqing Wang,<sup>†a</sup> Shurong Wang,<sup>†a</sup> Aipeng Chen,<sup>a</sup> Ruoke Wang,<sup>a</sup> Lanting Li,<sup>b</sup> Xiaoni Fang<sup>\*a</sup>

a. School of Pharmacy, Fudan University, Shanghai, 200438, China

b. Sinopec Shanghai Research Institute of Petrochemical Technology, Shanghai, 201208, China

<sup>†</sup> Y. W and S. W. contributed equally

\* Corresponding author: X. F. Email address: xnfang@fudan.edu.cn

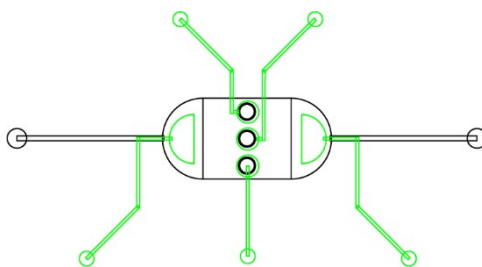

**Fig S1.** Design of the Sub-ExoProfile chip.

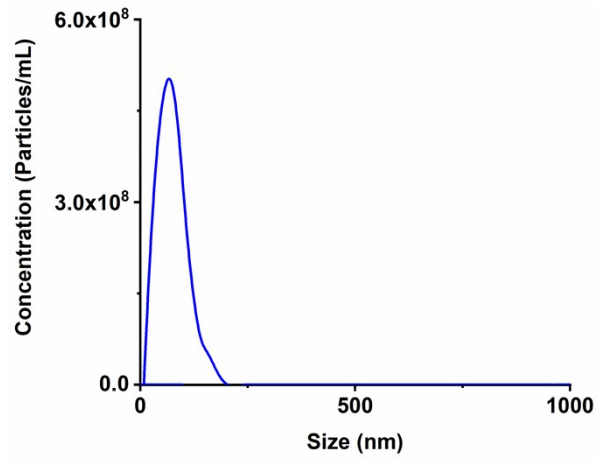

**Fig. S2** NTA measurements of exosomes isolated from MCF-7 breast cancer cell culture medium by classical ultracentrifugation.

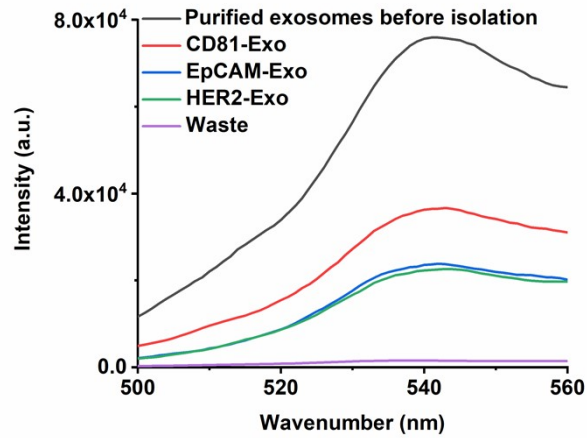

**Fig. S3** Fluorescence change of the DiO-stained exosomes before and after isolation by the Exo-SubProfile chip.

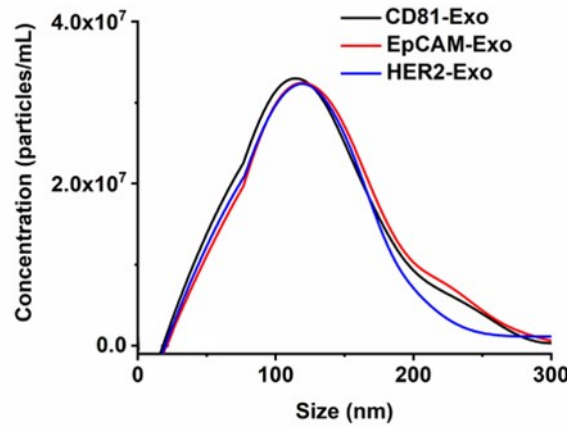

**Fig. S4** Size distribution of the three CD81-Exo, EpCAM-Exo, and HER2-Exo captured by the Exo-SubProfile chip.

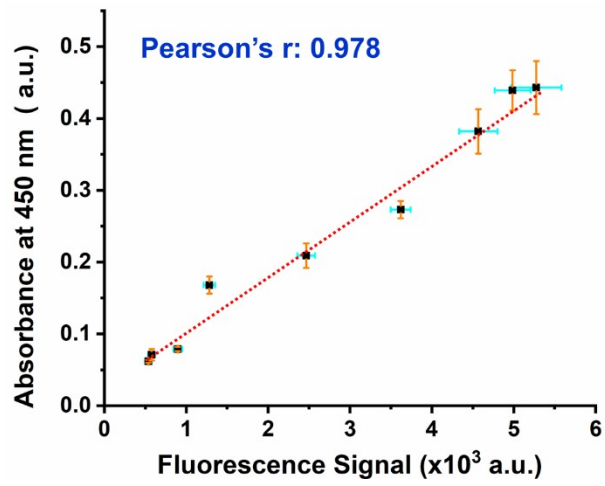

**Fig. S5** Correlations between microplate ELISA and on-chip analysis of CD81, EpCAM and HER2 positive exosomes from three cell lines.

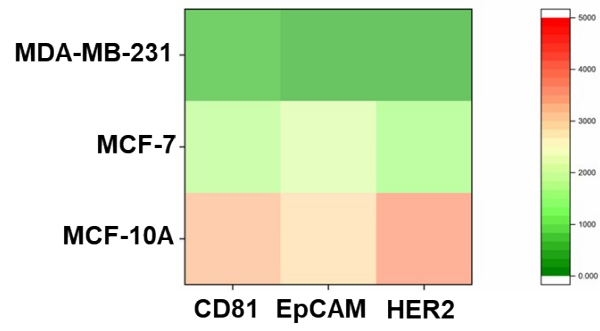

**Fig. S6.** Profiling of CD81, EpCAM, HER2 specific exosome subpopulations from MDA-MB-231, MCF-7, MCF-10A cell lines by flat glass chip.

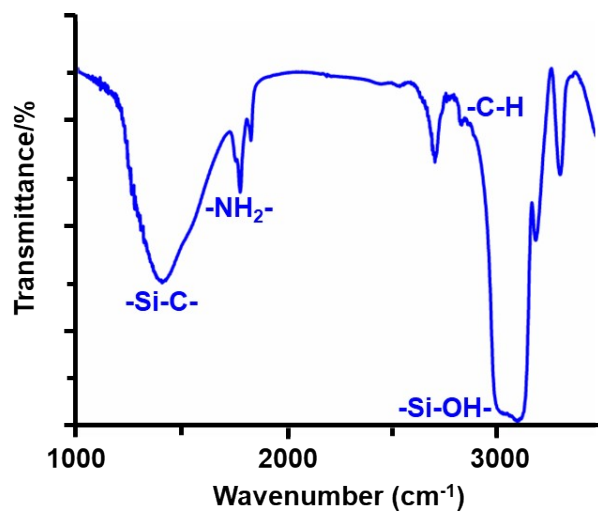

**Fig. S7** FT-IR of the self-assembled amphiphilic mesoporous SiNPs on the nanopillars of Exo-SubProfile chip.

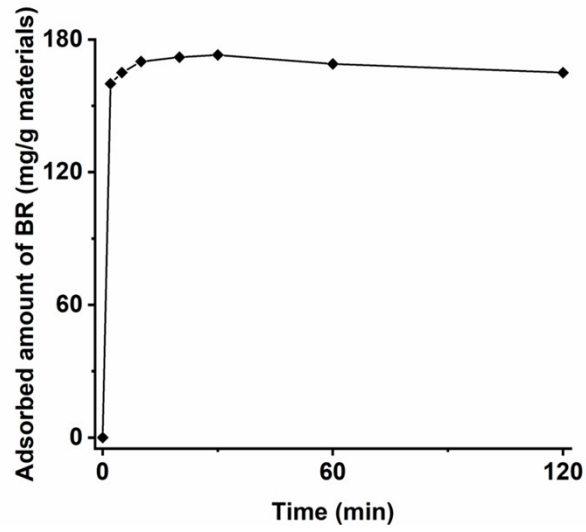

**Fig. S8** Adsorption of model membrane protein bacteriorhodopsin into the self-assembled amphiphilic mesoporous SiNPs on the nanopillars of Exo-SubProfile chip as a function of incubation time.



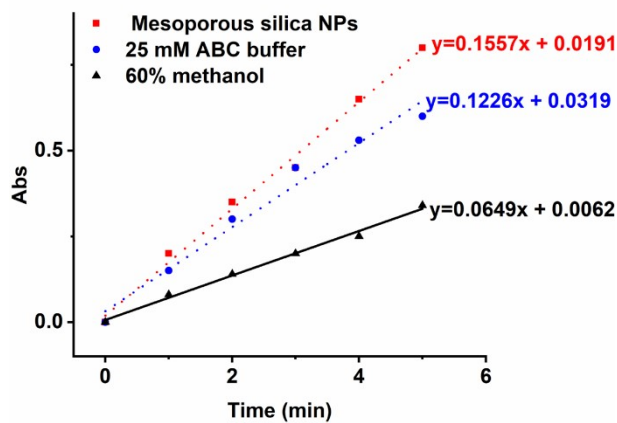

**Fig. S9** Trypsin activity in different system. The substrate involved in the system was BAEE with an initial concentration of 0.8 mg/mL. The absorbance (Abs) corresponds to BA at 253 nm, which was generated from BAEE by trypsin-catalyzed hydrolysis. The concentration of enzyme was 0.5 mg/mL.

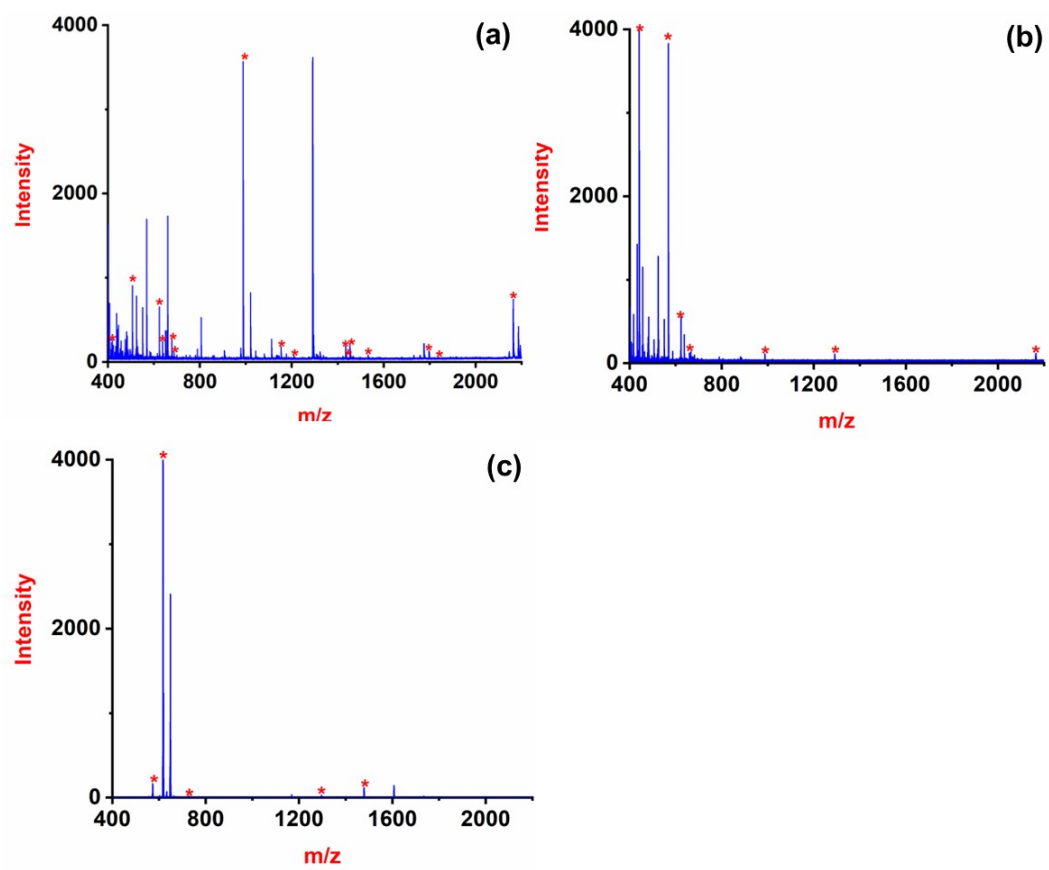

**Fig. S10** Mass spectra of proteolysis products from (a) 10 min self-assembled mesoporous SiNPs on the Exo-SubProfile chip-assisted BR (100 ng/μL) digestion, (b) 10 min nonporous SiNPs-assisted BR (100 ng/μL) digestion, and (c) 10 min traditional in-solution BR (100 ng/μL) digestion

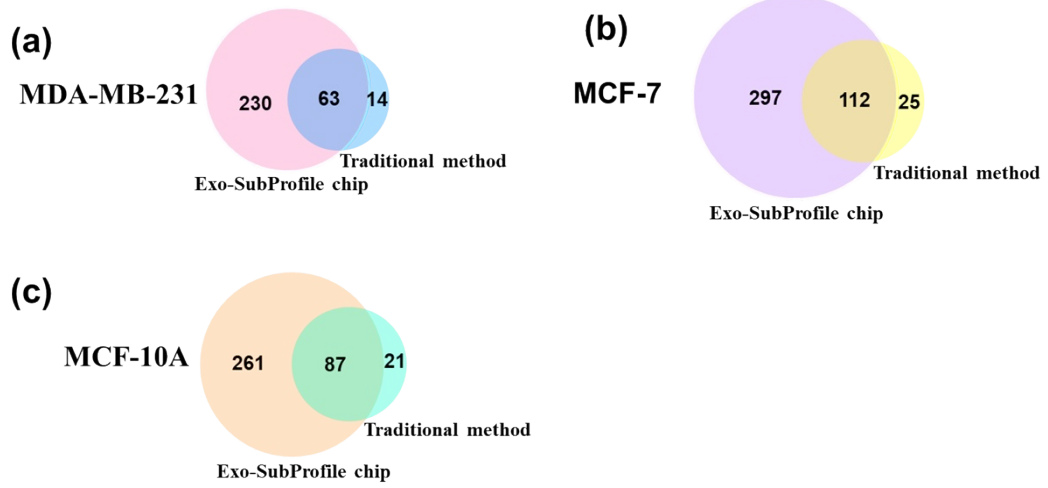

**Fig. S11** Venn diagram of identified total proteins from the three CD81-Exo, EpCAM-Exo, and HER2-Exo of (a) MDA-MB-231, (b) MCF-7, and (c) MCF-10A by both the Exo-SubProfile chip and traditional method.

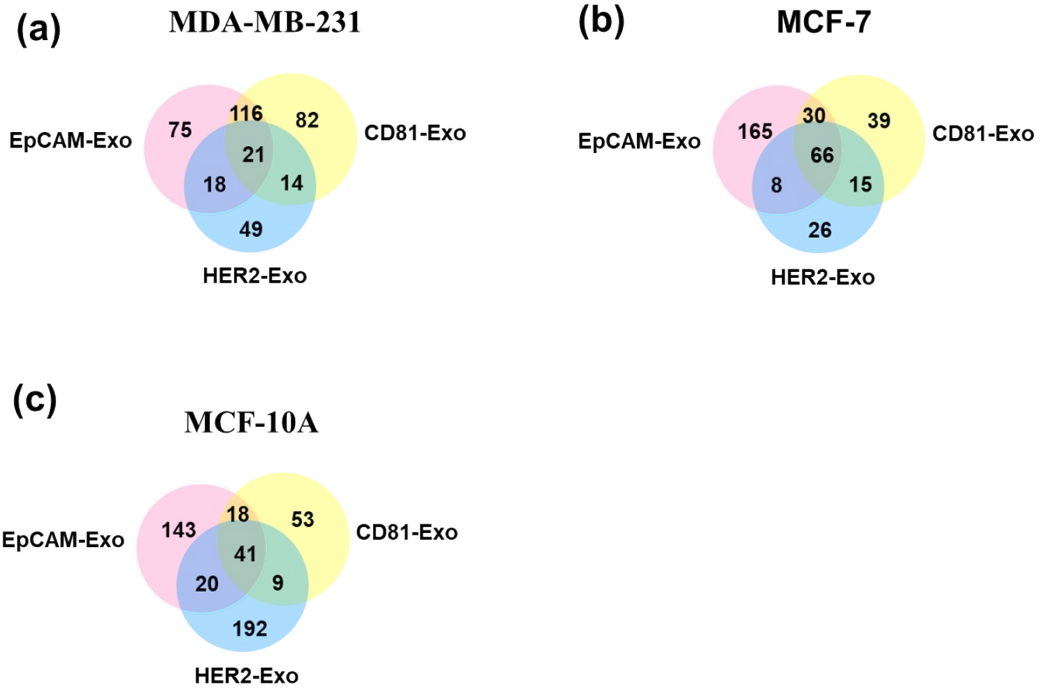

**Fig. S12** Venn diagram of identified proteins from the three CD81-Exo EpCAM-Exo, and HER2-Exo of (a) MDA-MB-231, (b) MCF-7, and (c) MCF-10A by the Exo-SubProfile chip.

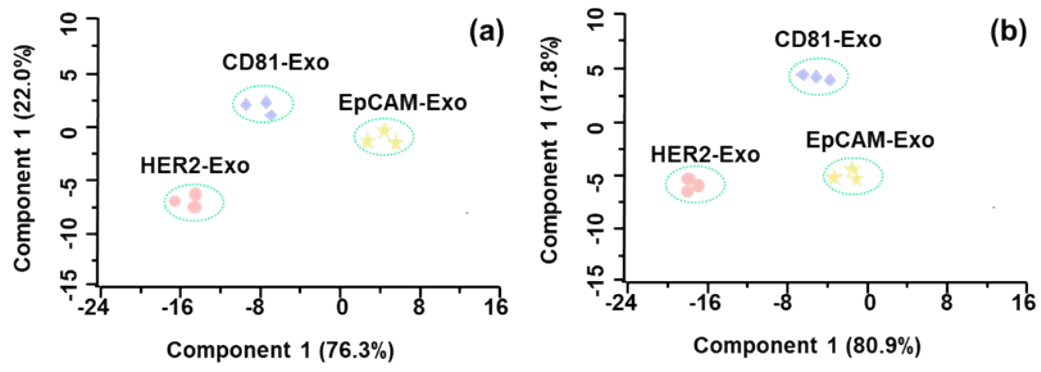

**Fig. S13** Quantitative principal analysis (PCA) shows that the Exo-SubProfile chip enabled the three CD81-Exo, EpCAM-Exo, and HER2-Exo from MCF-7 and MCF-10A are well separated.

**Table S1.** The detailed information about the four categories of identified proteins from different exosomes subpopulations in different type of cancer patients.

| Category                                  | Uniprot | Gene   | HER2 positive BC |           |          | TNBC     |           |          | Description                                               |
|-------------------------------------------|---------|--------|------------------|-----------|----------|----------|-----------|----------|-----------------------------------------------------------|
|                                           |         |        | CD81-Exo         | EpCAM-Exo | HER2-Exo | CD81-Exo | EpCAM-Exo | HER2-Exo |                                                           |
| Tyrosine kinases                          | P06213  | INSR   | 1                | 0         | 0        | 5        | 1         | 0        | Isoform Short of Insulin receptor                         |
|                                           | P04626  | ERBB2  | 0                | 18        | 0        | 0        | 0         | 0        | Receptor tyrosine-protein kinase erbB-2                   |
|                                           | P00533  | EGFR   | 2                | 0         | 0        | 3        | 0         | 0        | Epidermal growth factor receptor                          |
|                                           | P30530  | AXL    | 0                | 0         | 5        | 0        | 0         | 0        | Tyrosine-protein kinase receptor UFO                      |
| Major histocompatibility class I proteins | P30508  | HLA-C  | 0                | 0         | 1        | 0        | 1         | 0        | HLA class I histocompatibility antigen, Cw-12 alpha chain |
|                                           | P01892  | HLA-A  | 0                | 0         | 0        | 3        | 0         | 0        | HLA class I histocompatibility antigen, A-2 alpha chain   |
|                                           | P61769  | B2M    | 1                | 0         | 0        | 1        | 0         | 0        | Beta-2-microglobulin                                      |
| Cell adhesion molecules                   | P14923  | JUP    | 0                | 2         | 0        | 2        | 0         |          |                                                           |
|                                           | O60716  | CTNND1 | 2                | 0         | 1        | 1        | 2         | 0        | Junction plakoglobin                                      |
|                                           | P05556  | ITGB1  | 0                | 0         | 0        | 20       | 3         | 1        | Catenin delta-1                                           |
|                                           | P26006  | ITGA3  | 1                | 0         | 0        | 0        | 19        | 0        | Integrin alpha-3                                          |
|                                           | P1      | ITGA2  | 0                | 0         | 1        | 20       | 3         | 0        | Integrin alpha-2                                          |

|                                 |                |                |    |   |   |   |    |   |                                                                        |
|---------------------------------|----------------|----------------|----|---|---|---|----|---|------------------------------------------------------------------------|
|                                 | 73<br>01       | A2             |    |   |   |   |    |   |                                                                        |
|                                 | P3<br>52<br>21 | CT<br>NN<br>A1 | 2  | 0 | 0 | 4 | 0  | 0 | Catenin alpha-1                                                        |
|                                 | P4<br>31<br>21 | MC<br>AM       | 0  | 0 | 0 | 0 | 18 | 0 | Cell surface glycoprotein<br>MUC18                                     |
|                                 | Q0<br>24<br>87 | DS<br>C2       | 0  | 0 | 1 | 0 | 0  | 0 | Desmocollin-2                                                          |
|                                 | P1<br>61<br>44 | ITG<br>B4      | 0  | 0 | 1 | 0 | 0  | 1 | Integrin beta, Isoform Beta-<br>4A                                     |
|                                 | P1<br>60<br>70 | CD<br>44       | 0  | 0 | 0 | 1 | 0  | 0 | CD44 antigen                                                           |
|                                 | P2<br>19<br>26 | CD<br>9        | 0  | 0 | 0 | 3 | 0  | 0 | CD9 antigen                                                            |
|                                 | P4<br>85<br>0  | CD<br>151      | 0  | 0 | 0 | 0 | 1  | 0 | CD151 antigen                                                          |
|                                 |                |                |    |   |   |   |    |   |                                                                        |
| G protein-<br>coupled receptors | P6<br>28<br>73 | GN<br>B1       | 15 | 2 | 3 | 3 | 0  | 0 | Guanine nucleotide-binding<br>protein G(I)/G(S)/G(T)<br>subunit beta-1 |
|                                 | P6<br>28<br>79 | GN<br>B2       | 12 | 0 | 1 | 7 | 1  | 0 | Guanine nucleotide-binding<br>protein G(I)/G(S)/G(T)<br>subunit beta-2 |
|                                 | P0<br>48<br>99 | GN<br>AI2      | 11 | 4 | 0 | 2 | 0  | 0 | Guanine nucleotide-binding<br>protein G(i) subunit alpha-2             |
|                                 | P4<br>89<br>60 | CD<br>97       | 2  | 0 | 8 | 0 | 1  | 1 | CD97 antigen                                                           |
|                                 | P6<br>39<br>02 | GN<br>AS       | 5  | 2 | 1 | 0 | 1  | 0 | Guanine nucleotide-binding<br>protein G(i) subunit alpha-1             |
|                                 | Q1<br>43<br>44 | GN<br>A13      | 0  | 3 | 0 | 0 | 3  | 0 | Guanine nucleotide-binding<br>protein subunit alpha-13                 |
